# Supplementary material
Source: PubMed Central journal article supplement (PMC7960128)
Supplement: 14-01165.pdf [file 14-01165.pdf]

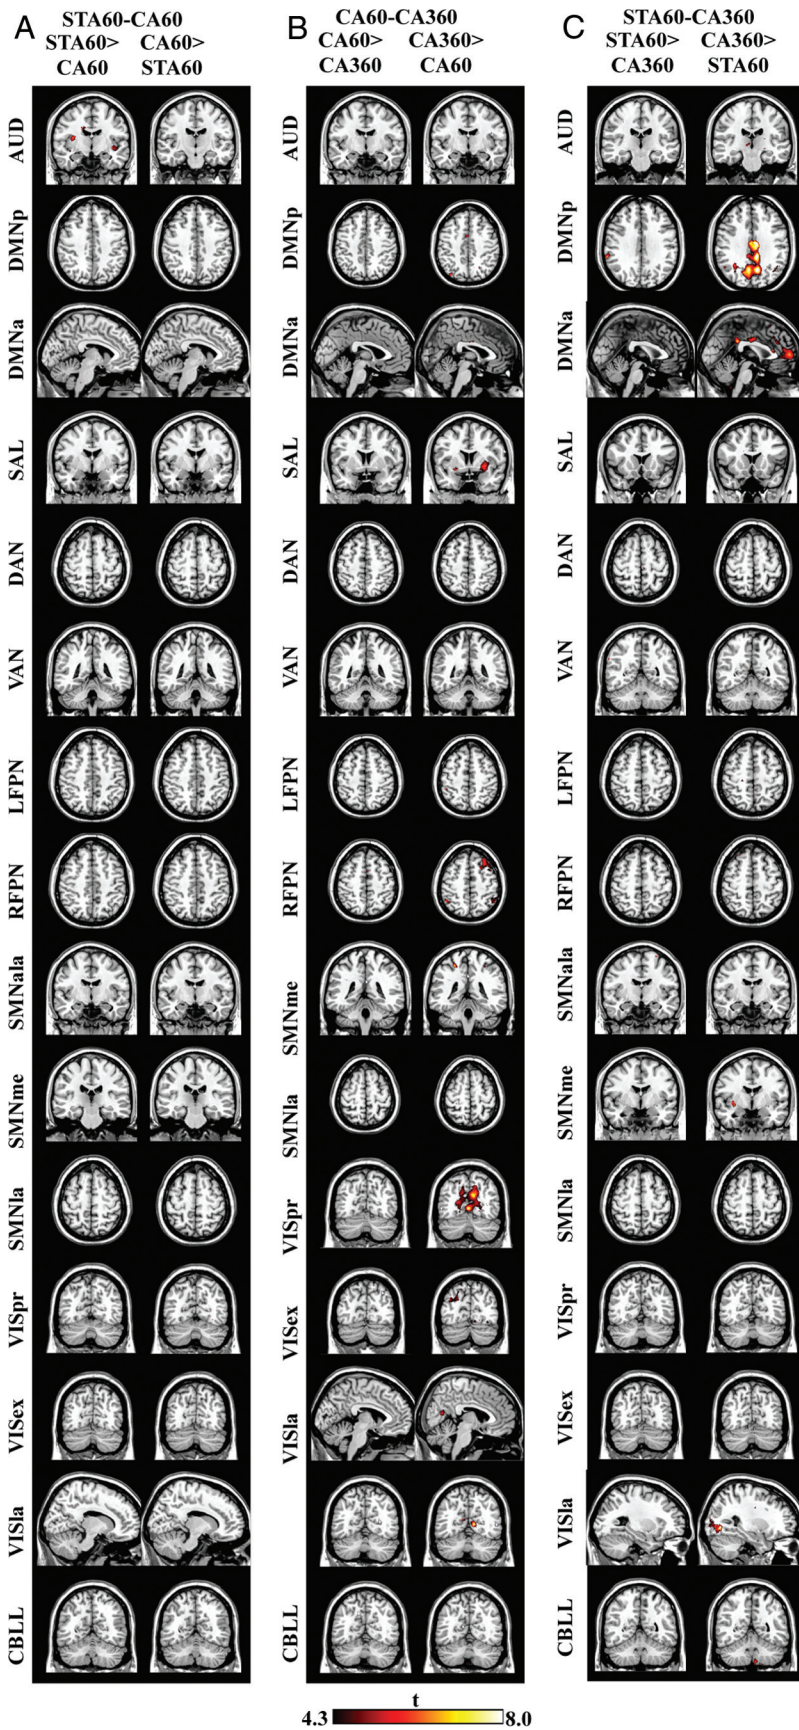

**ON-LINE FIG 1.** Statistical comparison of RSN spatial maps from (A) STA60-CA60, (B) CA60-CA360, and (C) STA60-CA360 datasets by using the paired  $t$  test. Spatial maps are presented on the most representative section according to a neurologic convention thresholded at false discovery rate corrected  $q < 0.05$ .

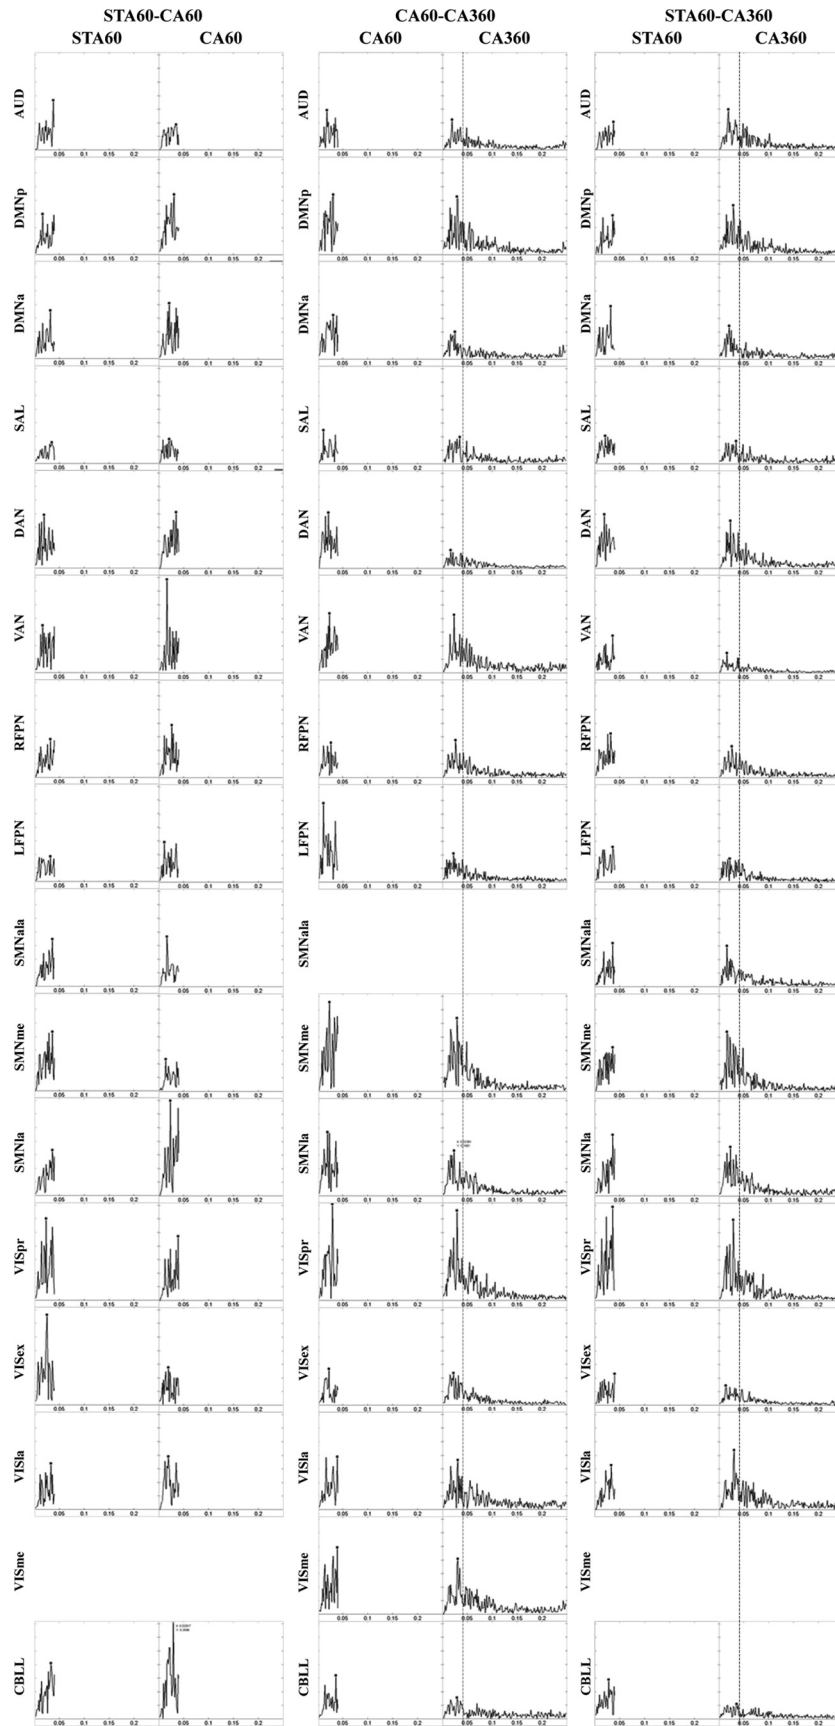

**ON-LINE FIG 2.** The frequency plots of the identified RSNs from the 3 pair-wise ICA analyses. The plots are presented on a linear scale; the vertical axis represents the unit amplitude of the spectrum (the axis length is fixed at 0 to 0.36 for all plots). The spectral peak for each component is marked with a black dot. The Nyquist frequency of STA (0.0417 Hz) is represented by a dotted line on CA frequency plots.

**On-line Table 1: Coordinates of ROI center voxel<sup>a</sup>**

|       | Resting State Network                 | ROI Notation | STA60-CA60    | CA60-CA360    | STA60-CA360   |
|-------|---------------------------------------|--------------|---------------|---------------|---------------|
| AUD   | L superior temporal gyrus             | AUD_L        | -42, -10, -2  | -42, -14, 6   | -42, -10, -2  |
|       | R superior temporal gyrus             | AUD_R        | 50, -4, -12   | 44, -10, 10   | 50, -8, 0     |
| DMNp  | B posterior cingulate gyrus/precuneus | DMNp_M       | -6, -46, 26   | 6, -68, 38    | 6, -44, 28    |
|       | L inferior parietal gyrus             | DMNp_L       | -30, -68, 36  | -38, -56, 44  | -32, -72, 42  |
| DMNa  | R inferior parietal gyrus             | DMNp_R       | 36, -56, 46   | 38, -64, 32   | 34, -62, 48   |
|       | M frontal lobe                        | DMNa_F       | 8, 52, 6      | -4, 50, 16    | 2, 50, 20     |
| SAL   | M posterior cingulate gyrus           | DMNa_P       | 4, -52, 22    | 0, -42, 28    | 0, -52, 22    |
|       | M anterior cingulate gyrus            | SAL_M        | 4, 36, 20     | 2, 28, 38     | 8, 28, 28     |
| DAN   | L anterior insular gyrus              | SAL_L        | -44, 10, -4   | -42, 30, 6    | -34, 26, 0    |
|       | R anterior insular gyrus              | SAL_R        | 38, 8, -2     | 36, 24, 2     | 36, 28, -8    |
| VAN   | L superior parietal gyrus             | DAN_L        | -28, -80, 30  | -20, -66, 52  | -16, -74, 56  |
|       | R superior parietal gyrus             | DAN_R        | 16, -80, 50   | 30, -76, 30   | 28, -72, 48   |
| RFPN  | M precuneus                           | VAN_M        | -6, -62, 58   | 2, -50, 52    | 6, -56, 36    |
|       | L supramarginal gyrus                 | VAN_L        | -58, -36, 36  | -44, -50, 8   | -48, -54, 10  |
| LFPN  | R supramarginal gyrus                 | VAN_R        | 54, -46, 20   | 54, -50, 24   | 50, -48, 16   |
|       | R inferior parietal lobule            | RFPN_F       | 36, 50, 2     | 44, 38, 22    | 28, -72, 42   |
| SMNla | R middle/superior frontal gyrus       | RFPN_P       | 36, -46, 46   | 38, -70, 42   | 42, 44, -12   |
|       | L inferior parietal lobule            | LFPN_F       | -40, 44, 14   | -40, 28, 6    | -24, -62, 50  |
| SMNme | L middle/superior frontal gyrus       | LFPN_P       | -40, -62, 36  | -46, -70, 30  | -44, 32, 12   |
|       | L lateral precentral gyrus            | SMNla_L      | -48, -16, 32  |               | -54, -14, 12  |
| SMNla | R lateral precentral gyrus            | SMNla_R      | 40, -18, 40   |               | 48, -14, 38   |
|       | L medial paracentral lobule           | SMNme_L      | -18, -18, 64  | -16, -16, 66  | -26, -30, 54  |
| VISla | R medial paracentral lobule           | SMNme_R      | 24, -34, 76   | 14, -10, 70   | 24, -38, 76   |
|       | L postcentral gyrus                   | SMNla_L      | -36, -46, 58  | -36, -38, 42  | -22, -8, 62   |
| VISex | R postcentral gyrus                   | SMNla_R      | 30, -40, 48   | 42, -22, 66   | 32, -10, 62   |
|       | L calcarine sulcus                    | VISpr_L      | -16, -66, 8   | -36, -38, 42  | -16, -54, 2   |
| VISme | R calcarine sulcus                    | VISpr_R      | 14, -72, 34   | 42, -22, 66   | 20, -52, 0    |
|       | L lingual gyrus                       | VISex_L      | -22, -64, -10 | -42, -54, -28 | -38, -64, -4  |
| VISla | R lingual gyrus                       | VISex_R      | 26, -58, -8   | 28, -62, 46   | 40, -64, -4   |
|       | L lingual gyrus                       | VISla_L      | -14, -48, -12 | -24, -34, -12 | -30, -52, -10 |
| VISme | R lingual gyrus                       | VISla_R      | 26, -44, 2    | 14, -64, 14   | 16, -48, -8   |
|       | L occipital fusiform gyrus            | VISme_L      |               | -16, -90, -8  |               |
| CBLL  | R occipital fusiform gyrus            | VISme_R      |               | 22, -78, -10  |               |
|       | L cerebellum                          | CBLL_L       | -20, -54, -56 | -20, -34, -28 | -18, -52, -18 |
|       | R cerebellum                          | CBLL_R       | 38, -60, -26  | 20, -58, -60  | 20, -50, -22  |

**Note:**—L indicates left; R, right; B, bilateral; M, medial; F, frontal; P, posterior; AUD, auditory; DMNp/a, default mode posterior/anterior; SAL, salience; DAN/VAN, dorsal/ventral attentional; RFPN/LFPN, right/left frontoparietal; SS Mala/me/la, sensorimotor anteromedial/medial/lateral; VISpr/ex/la/me, visual primary/extrastriate/lateral/medial; CBLL, cerebellar networks.

<sup>a</sup> Coordinates for center voxels of ROIs were peak voxels of ICA maps obtained from the analyses of concatenated data of corresponding dataset pairs. Coordinates are presented in the Montreal Neurological Institute space.

On-line Table 2: Mean and standard deviation of voxel number, average PSC, and maximum PSC value for 15 RSNs from ICA results of each dataset pair

| RSN    | STA60-CA60 <sup>a,b</sup> |                              |             |             |         | CA60-CA360 <sup>a,c</sup>    |                          |                           |         |                              | STA60-CA360 <sup>a,d</sup> |             |         |                              |             |             |
|--------|---------------------------|------------------------------|-------------|-------------|---------|------------------------------|--------------------------|---------------------------|---------|------------------------------|----------------------------|-------------|---------|------------------------------|-------------|-------------|
|        | Dataset                   | Nvox                         | PSCav       | PSCmax      | Dataset | Nvox                         | PSCav                    | PSCmax                    | Dataset | Nvox                         | PSCav                      | PSCmax      | Dataset | Nvox                         | PSCav       | PSCmax      |
| AUD    | STA60                     | 1635.9 ± 2295.7              | 0.80 ± 0.58 | 3.73 ± 3.02 | CA60    | 2036.4 ± 3358.4              | 0.77 ± 0.57              | 3.43 ± 2.47               | STA60   | 1445.1 ± 2213.9              | 0.80 ± 0.58                | 3.73 ± 3.02 | STA60   | 1445.1 ± 2213.9              | 0.80 ± 0.58 | 3.73 ± 3.02 |
|        | CA60                      | 1758.5 ± 4352.8              | 0.57 ± 0.75 | 2.54 ± 3.7  | CA360   | 1768.1 ± 3045.9              | 0.80 ± 0.69              | 3.29 ± 3.00               | CA360   | 2441.6 ± 4394.2              | 0.57 ± 0.75                | 2.54 ± 3.70 | CA360   | 2441.6 ± 4394.2              | 0.57 ± 0.75 | 2.54 ± 3.70 |
| DMNp   | STA60                     | 2452.4 ± 1811.4              | 1.02 ± 0.35 | 5.99 ± 2.82 | CA60    | 5722.6 ± 3640.1              | 1.50 ± 0.59              | 8.05 ± 3.08               | STA60   | 2275.1 ± 1840.5              | 1.02 ± 0.35                | 6.06 ± 2.89 | STA60   | 2275.1 ± 1840.5              | 1.02 ± 0.35 | 6.06 ± 2.89 |
|        | CA60                      | 5201.9 ± 4123.8 <sup>e</sup> | 1.40 ± 0.67 | 7.33 ± 3.47 | CA360   | 6853.0 ± 4227.5              | 1.87 ± 0.63              | 10.27 ± 2.68 <sup>e</sup> | CA360   | 5208.9 ± 1910.5 <sup>e</sup> | 1.40 ± 0.67                | 7.33 ± 3.47 | CA360   | 5208.9 ± 1910.5 <sup>e</sup> | 1.40 ± 0.67 | 7.33 ± 3.47 |
| DMNa   | STA60                     | 1425.6 ± 1542.3              | 0.77 ± 0.48 | 3.4 ± 2.14  | CA60    | 6515.5 ± 7011.3              | 1.32 ± 0.80              | 5.33 ± 3.48               | STA60   | 1512.1 ± 1213.8              | 0.77 ± 0.48                | 3.40 ± 2.14 | STA60   | 1512.1 ± 1213.8              | 0.77 ± 0.48 | 3.40 ± 2.14 |
|        | CA60                      | 3338.7 ± 4271.5              | 0.89 ± 0.73 | 3.63 ± 2.97 | CA360   | 4785.2 ± 2865.2              | 1.38 ± 0.42              | 5.55 ± 1.85               | CA360   | 5562.9 ± 3236 <sup>e</sup>   | 0.89 ± 0.73                | 3.63 ± 2.97 | CA360   | 5562.9 ± 3236 <sup>e</sup>   | 0.89 ± 0.73 | 3.63 ± 2.97 |
| SAL    | STA60                     | 1370.6 ± 2745.5              | 0.65 ± 0.44 | 3.21 ± 2.21 | CA60    | 153.6 ± 4180.2               | 0.65 ± 0.44              | 3.21 ± 2.21               | STA60   | 3077.4 ± 6942.1              | 0.65 ± 0.44                | 3.21 ± 2.21 | STA60   | 3077.4 ± 6942.1              | 0.65 ± 0.44 | 3.21 ± 2.21 |
|        | CA60                      | 1453.6 ± 2853.0              | 0.57 ± 0.45 | 2.78 ± 2.11 | CA360   | 4401.7 ± 5766.7 <sup>e</sup> | 0.57 ± 0.45              | 2.78 ± 2.11               | CA360   | 2579.0 ± 3972.1              | 0.57 ± 0.45                | 2.78 ± 2.11 | CA360   | 2579.0 ± 3972.1              | 0.57 ± 0.45 | 2.78 ± 2.11 |
| DAN    | STA60                     | 2031.5 ± 3311.1              | 0.81 ± 0.56 | 3.80 ± 2.34 | CA60    | 1302.2 ± 3734.8              | 0.54 ± 0.67              | 2.59 ± 3.08               | STA60   | 4715.6 ± 5192.4              | 0.81 ± 0.56                | 3.8 ± 2.34  | STA60   | 4715.6 ± 5192.4              | 0.81 ± 0.56 | 3.8 ± 2.34  |
|        | CA60                      | 1379.0 ± 2550.2              | 0.63 ± 0.52 | 3.32 ± 3.02 | CA360   | 2762.1 ± 5223.3              | 0.90 ± 1.15              | 4.58 ± 6.13               | CA360   | 2857.8 ± 4850.1              | 0.63 ± 0.52                | 3.32 ± 3.02 | CA360   | 2857.8 ± 4850.1              | 0.63 ± 0.52 | 3.32 ± 3.02 |
| VAN    | STA60                     | 5409.8 ± 3995.2              | 1.15 ± 0.47 | 3.80 ± 2.34 | CA60    | 4085.1 ± 10435.3             | 0.96 ± 0.74              | 3.88 ± 2.64               | STA60   | 4089.6 ± 5602.3              | 1.15 ± 0.47                | 7.85 ± 3.40 | STA60   | 4089.6 ± 5602.3              | 1.15 ± 0.47 | 7.85 ± 3.40 |
|        | CA60                      | 4682.9 ± 6527.4              | 0.90 ± 0.80 | 3.32 ± 3.02 | CA360   | 1543.1 ± 2552.9              | 0.82 ± 0.56              | 3.27 ± 2.14               | CA360   | 742.1 ± 1347.6               | 0.90 ± 0.80                | 5.41 ± 4.65 | CA360   | 742.1 ± 1347.6               | 0.90 ± 0.80 | 5.41 ± 4.65 |
| RFPN   | STA60                     | 3511.7 ± 2700.2              | 1.10 ± 0.47 | 5.38 ± 2.26 | CA60    | 2907.6 ± 3465.4              | 0.93 ± 0.61              | 4.43 ± 3.11               | STA60   | 11498.1 ± 377.4              | 1.10 ± 0.47                | 5.38 ± 2.26 | STA60   | 11498.1 ± 377.4              | 1.10 ± 0.47 | 5.38 ± 2.26 |
|        | CA60                      | 4154.4 ± 6295.9              | 0.99 ± 0.75 | 4.49 ± 3.39 | CA360   | 5785.9 ± 2898.5 <sup>e</sup> | 1.49 ± 0.39 <sup>e</sup> | 7.11 ± 2.04 <sup>e</sup>  | CA360   | 10933.6 ± 929.7              | 0.99 ± 0.75                | 4.49 ± 3.39 | CA360   | 10933.6 ± 929.7              | 0.99 ± 0.75 | 4.49 ± 3.39 |
| LFPN   | STA60                     | 1836.0 ± 2366.8              | 0.74 ± 0.52 | 3.79 ± 2.98 | CA60    | 5561.4 ± 11149.6             | 0.88 ± 0.90              | 3.99 ± 3.76               | STA60   | 2229.9 ± 1879.4              | 0.74 ± 0.52                | 3.79 ± 2.98 | STA60   | 2229.9 ± 1879.4              | 0.74 ± 0.52 | 3.79 ± 2.98 |
|        | CA60                      | 1698.3 ± 4670.6              | 0.63 ± 0.65 | 2.69 ± 2.96 | CA360   | 1833.4 ± 2122.2              | 0.81 ± 0.41              | 4.01 ± 2.38               | CA360   | 2500.6 ± 2129.4              | 0.63 ± 0.65                | 2.69 ± 2.96 | CA360   | 2500.6 ± 2129.4              | 0.63 ± 0.65 | 2.69 ± 2.96 |
| SSMala | STA60                     | 5600.1 ± 7429.8              | 1.31 ± 0.76 | 6.67 ± 4.23 | CA60    | 2588.9 ± 3266.3              | 1.14 ± 0.91              | 5.36 ± 4.40               | STA60   | 7810.6 ± 13247.3             | 1.31 ± 0.76                | 6.67 ± 4.23 | STA60   | 7810.6 ± 13247.3             | 1.31 ± 0.76 | 6.67 ± 4.23 |
|        | CA60                      | 5003.4 ± 6626.8              | 1.61 ± 0.79 | 7.11 ± 3.66 | CA360   | 7177.9 ± 8772.5              | 1.77 ± 1.20              | 7.28 ± 5.37               | CA360   | 2132.7 ± 1811.1              | 1.14 ± 0.91                | 5.36 ± 4.40 | CA360   | 2132.7 ± 1811.1              | 1.14 ± 0.91 | 5.36 ± 4.40 |
| SSMme  | STA60                     | 3021.1 ± 6262.1              | 1.33 ± 1.13 | 5.62 ± 5.42 | CA60    | 7807.8 ± 7202.7              | 2.24 ± 1.26              | 8.88 ± 5.36               | STA60   | 4182.3 ± 3373.6              | 1.61 ± 0.79                | 7.11 ± 3.66 | STA60   | 4182.3 ± 3373.6              | 1.61 ± 0.79 | 7.11 ± 3.66 |
|        | CA60                      | 5109.6 ± 8254.2              | 1.12 ± 0.67 | 6.55 ± 3.80 | CA360   | 5831.1 ± 9673.5              | 1.23 ± 1.10              | 6.63 ± 5.86               | CA360   | 4259.7 ± 4430.1              | 1.33 ± 1.13                | 5.62 ± 5.42 | CA360   | 4259.7 ± 4430.1              | 1.33 ± 1.13 | 5.62 ± 5.42 |
| SSMla  | STA60                     | 4638.1 ± 7109.0              | 0.94 ± 0.95 | 5.05 ± 5.36 | CA60    | 6429.2 ± 6722.5 <sup>e</sup> | 1.48 ± 1.09 <sup>e</sup> | 8.28 ± 6.05 <sup>e</sup>  | STA60   | 7322.9 ± 7394.0              | 1.12 ± 0.67                | 6.55 ± 3.80 | STA60   | 7322.9 ± 7394.0              | 1.12 ± 0.67 | 6.55 ± 3.80 |
|        | CA60                      | 7609.4 ± 5674.9              | 2.12 ± 0.80 | 8.86 ± 3.75 | CA360   | 5637.4 ± 4785.5              | 1.99 ± 1.22              | 7.26 ± 4.51               | CA360   | 6194.9 ± 7707.4              | 0.94 ± 0.95                | 5.05 ± 5.36 | CA360   | 6194.9 ± 7707.4              | 0.94 ± 0.95 | 5.05 ± 5.36 |
| VISpr  | STA60                     | 5613.4 ± 5212.2              | 1.95 ± 1.33 | 7.22 ± 4.81 | CA60    | 9015.4 ± 1660.7 <sup>e</sup> | 3.08 ± 0.68 <sup>e</sup> | 11.11 ± 2.55 <sup>e</sup> | STA60   | 11398.6 ± 13383              | 2.12 ± 0.80                | 8.86 ± 3.75 | STA60   | 11398.6 ± 13383              | 2.12 ± 0.80 | 8.86 ± 3.75 |
|        | CA60                      | 4476.2 ± 7269.1              | 0.78 ± 0.94 | 3.34 ± 4.00 | CA360   | 1139.3 ± 2646.5              | 0.51 ± 0.56              | 2.08 ± 2.50               | CA360   | 7434.4 ± 3048.3              | 1.95 ± 1.33                | 7.22 ± 4.81 | CA360   | 7434.4 ± 3048.3              | 1.95 ± 1.33 | 7.22 ± 4.81 |
| VISex  | STA60                     | 4506.3 ± 5900.9              | 0.55 ± 0.36 | 2.01 ± 1.19 | CA60    | 4912.6 ± 6756.7              | 1.26 ± 1.17              | 4.92 ± 4.95               | STA60   | 3713.0 ± 9415.4              | 0.78 ± 0.94                | 3.34 ± 4.01 | STA60   | 3713.0 ± 9415.4              | 0.78 ± 0.94 | 3.34 ± 4.01 |
|        | CA60                      | 3349.4 ± 4330.5              | 0.74 ± 0.43 | 4.26 ± 2.44 | CA360   | 2636.9 ± 3936.8              | 0.75 ± 0.66              | 4.27 ± 4.04               | CA360   | 1310.4 ± 2407.2              | 0.55 ± 0.36                | 2.01 ± 1.19 | CA360   | 1310.4 ± 2407.2              | 0.55 ± 0.36 | 2.01 ± 1.19 |
| VISla  | STA60                     | 2224.6 ± 3522.3              | 0.53 ± 0.45 | 3.30 ± 2.92 | CA60    | 3568.6 ± 3831.8              | 1.09 ± 0.66              | 6.56 ± 4.58               | STA60   | 6460.2 ± 10215.8             | 0.74 ± 0.43                | 4.26 ± 2.44 | STA60   | 6460.2 ± 10215.8             | 0.74 ± 0.43 | 4.26 ± 2.44 |
|        | CA60                      | 6416.2 ± 13602.2             | 0.56 ± 0.66 | 6.53 ± 7.93 | CA360   | 6798.6 ± 6411.0              | 0.69 ± 0.44              | 8.41 ± 5.14               | CA360   | 8042.0 ± 3679.0              | 0.53 ± 0.45                | 3.3 ± 2.92  | CA360   | 8042.0 ± 3679.0              | 0.53 ± 0.45 | 3.3 ± 2.92  |
| VISme  | STA60                     | 2260.8 ± 4677.9              | 0.37 ± 0.31 | 4.67 ± 4.20 | CA60    | 8277.6 ± 3950.9              | 0.82 ± 0.29              | 12.3 ± 4.19               | STA60   | 3395.9 ± 6838.8              | 0.40 ± 0.41                | 3.95 ± 4.22 | STA60   | 3395.9 ± 6838.8              | 0.40 ± 0.41 | 3.95 ± 4.22 |
|        | CA60                      | 6416.2 ± 13602.2             | 0.56 ± 0.66 | 6.53 ± 7.93 | CA360   | 3081.9 ± 4447.5              | 0.45 ± 0.35              | 5.29 ± 4.33               | CA360   | 2239.3 ± 3501.9              | 0.43 ± 0.24                | 4.91 ± 2.99 | CA360   | 2239.3 ± 3501.9              | 0.43 ± 0.24 | 4.91 ± 2.99 |

**Note:**—Nvox indicates the number of voxels in each ROI; PSC, percentage signal change; PSCav, average percentage signal change; PSCmax, maximum percentage signal change; AUD, auditory; DMNp/a, default mode posterior/anterior; SAL, salience; DAN/VAN, dorsal/ventral attentional; RFPN/LFPN, right/left frontoparietal; SSMala/me/la, sensorimotor anterior/medial/lateral; VISpr/ex/la/me, visual primary/extrastriate/lateral/medial; CBLL, cerebellar networks.

<sup>a</sup>ICA was performed on the STA60-CA60, CA60-CA360, and STA60-CA360 concatenated data.

<sup>b</sup>In the STA60-CA60 comparison, a larger number of voxels was found for the posterior DMN in CA60.

<sup>c</sup>In the CA60-CA360 comparison, the CA360 dataset had larger values of the voxel number for the posterior DMN, and all 3 parameters were greater in CA360 for the right frontoparietal, lateral sensorimotor, and primary visual networks.

<sup>d</sup>In the STA60-CA360 comparison, the anterior and posterior DMN had a larger number of voxels in CA360.

<sup>e</sup>Significantly different from the other dataset ( $P < .05$ , Wilcoxon signed rank test, Bonferroni corrected).
